# Supplementary material for: P2X7 receptor activation mediates superoxide dismutase 1 (SOD1) release from murine NSC-34 motor neurons
Source: PubMed Central journal article supplement (PMC9832181; doi:10.1007/s11302-022-09863-5), 2022-04-28
Supplement: 11302_2022_9863_MOESM4_ESM.pdf [file 11302_2022_9863_MOESM4_ESM.pdf]

## Supplementary Material

### P2X7 receptor activation mediates superoxide dismutase 1 (SOD1) release from murine NSC-34 motor neurons

Rachael Bartlett<sup>1,2</sup>, Diane Ly<sup>1,2</sup>, Neil R. Cashman<sup>3</sup>, Ronald Sluyter<sup>1,2</sup>, Justin J. Yerbury<sup>1,2</sup>

<sup>1</sup> Illawarra Health and Medical Research Institute, Wollongong, NSW, 2522, Australia

<sup>2</sup> Molecular Horizons and School of Chemistry and Molecular Bioscience, University of Wollongong, Wollongong, NSW, 2522, Australia

<sup>3</sup> Djavad Mowafaghian Centre for Brain Health, University of British Columbia, Vancouver, BC, V6T 1Z3, Canada

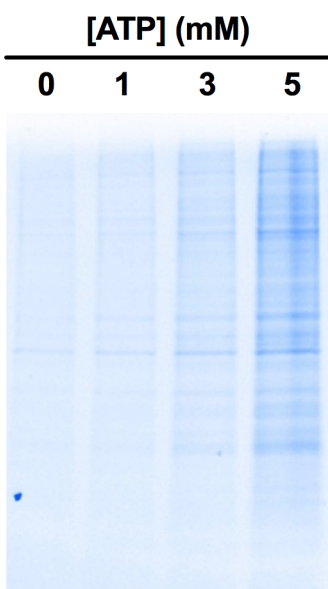

**Fig. S1** Extracellular ATP mediates protein release from NSC-34 motor neurons. SOD1<sup>G93A</sup>-EGFP (SOD1<sup>G93A</sup>)-transfected NSC-34 cells were pre-incubated for 1 h and then in the absence (0 mM) or presence of 1, 3 or 5 mM ATP for 20 min. Pelletable fractions were obtained by centrifugation, resuspended in equal volumes of sample buffer containing 5% 2-mercaptoethanol and separated using Stain-Free gels. The presence of total protein in each lane was captured using a Criterion Stain Free Gel Imaging System. One representative gel is shown. Data are representative of  $n = 3$  experiments.

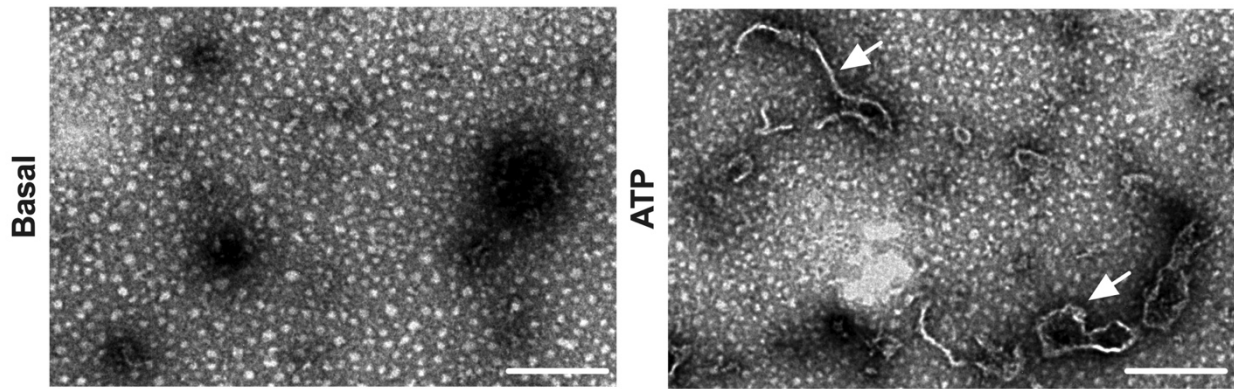

**Fig. S2.** P2X7 activation mediates SOD1<sup>G93A</sup> release from NSC-34 motor neurons. SOD1<sup>G93A</sup>-EGFP (SOD1<sup>G93A</sup>)-transfected NSC-34 cells were incubated in the absence (basal) or presence of 5 mM ATP for 20 min and pelletable fractions obtained by centrifugation. The presence of fibrillar SOD1 (arrows) in pelletable fractions was assessed by transmission electron microscopy. Data are representative of  $n = 1$  experiment; bars represent 200 nm.

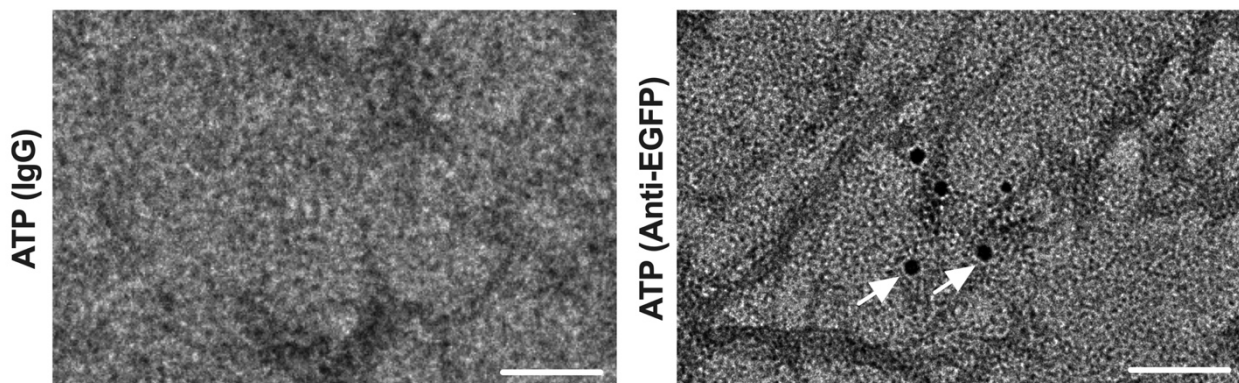

**Fig. S3.** P2X7 activation mediates SOD1<sup>G93A</sup> release from NSC-34 motor neurons. SOD1<sup>G93A</sup>-EGFP (SOD1<sup>G93A</sup>)-transfected NSC-34 cells were incubated in the presence of 5 mM ATP for 20 min and pelletable fractions obtained by centrifugation. Samples were pre-labelled with rabbit IgG or an anti-EGFP antibody and gold-conjugated secondary antibody and the presence of gold-labelled SOD1 (arrows) in pelletable fractions was assessed by transmission electron microscopy. Data are representative of  $n = 2$  experiments; bars represent 40 nm.

**Fig. S4** P2X7-mediated SOD1<sup>G93A</sup> release from NSC-34 motor neurons coincides with membrane blebbing. SOD1<sup>G93A</sup>-EGFP-transfected NSC-34 cells were incubated with 5 mM ATP and cells visualised by microscopy, with images captured every 30 s over 20 min. Representative recordings of (A) fluorescent, (B) bright-field and (C) overlaid images of cells within the same field of view are provided on the article site.
